# Supplementary material
Source: MDPI journal article supplement (https://www.mdpi.com/2073-4344/12/10/1250)
Supplement: s1 [file s1]

## Supporting Information

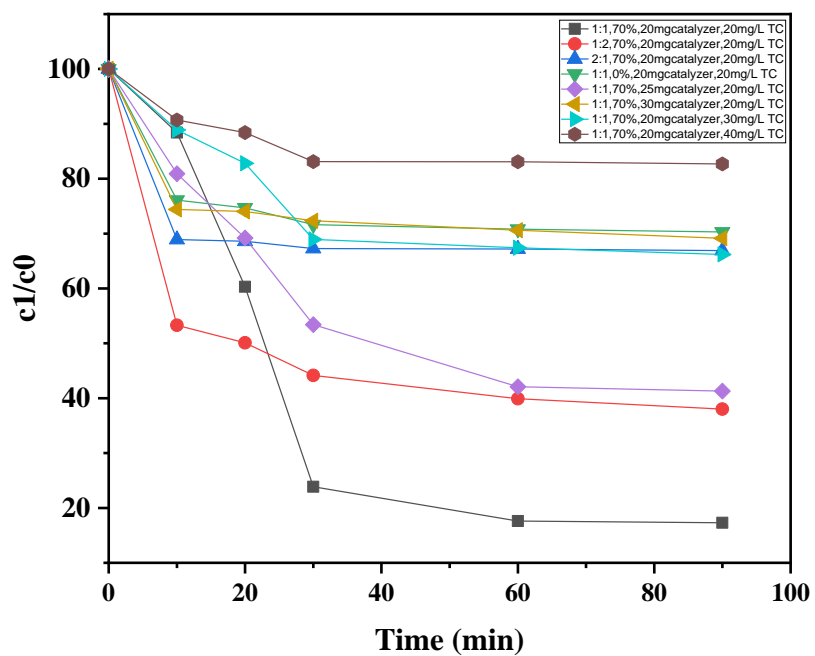

Figure S1. Adsorption of TC by ZnO-C/MnO<sub>2</sub> Catalyst under Different Conditions in Dark Reaction.
